# Supplementary material
Source: ML conference proceedings conference paper supplement (https://openreview.net/forum?id=H4OE7toXpa)

PCA

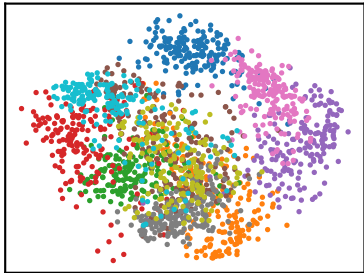

KPCA

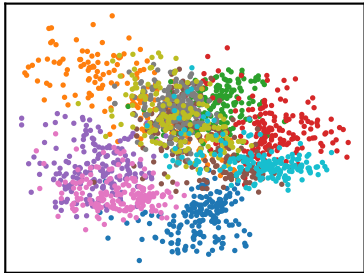

LE

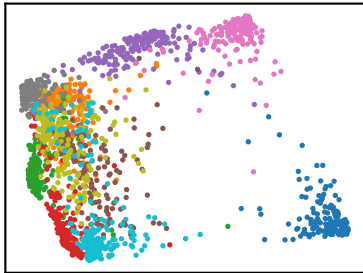

Isomap

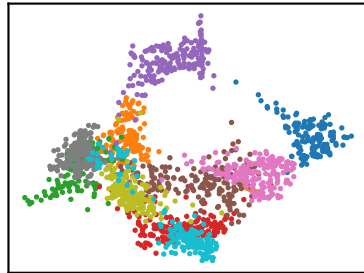 $t$ -SNE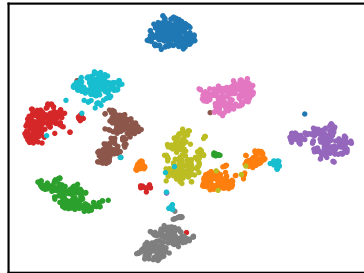

UMAP

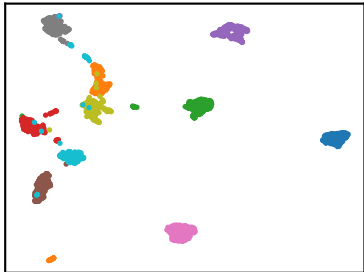

GPLVM

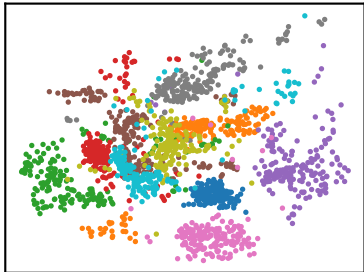

VAE

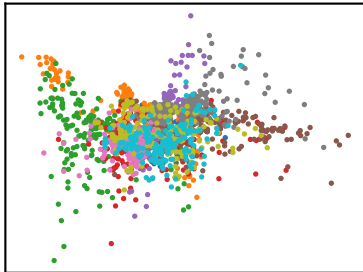

IKD

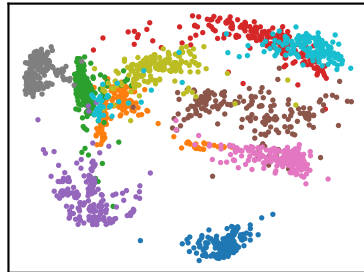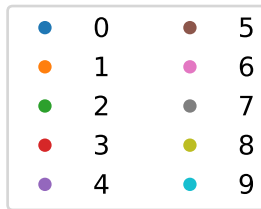

Supplement: supplementary_material [file attachment]

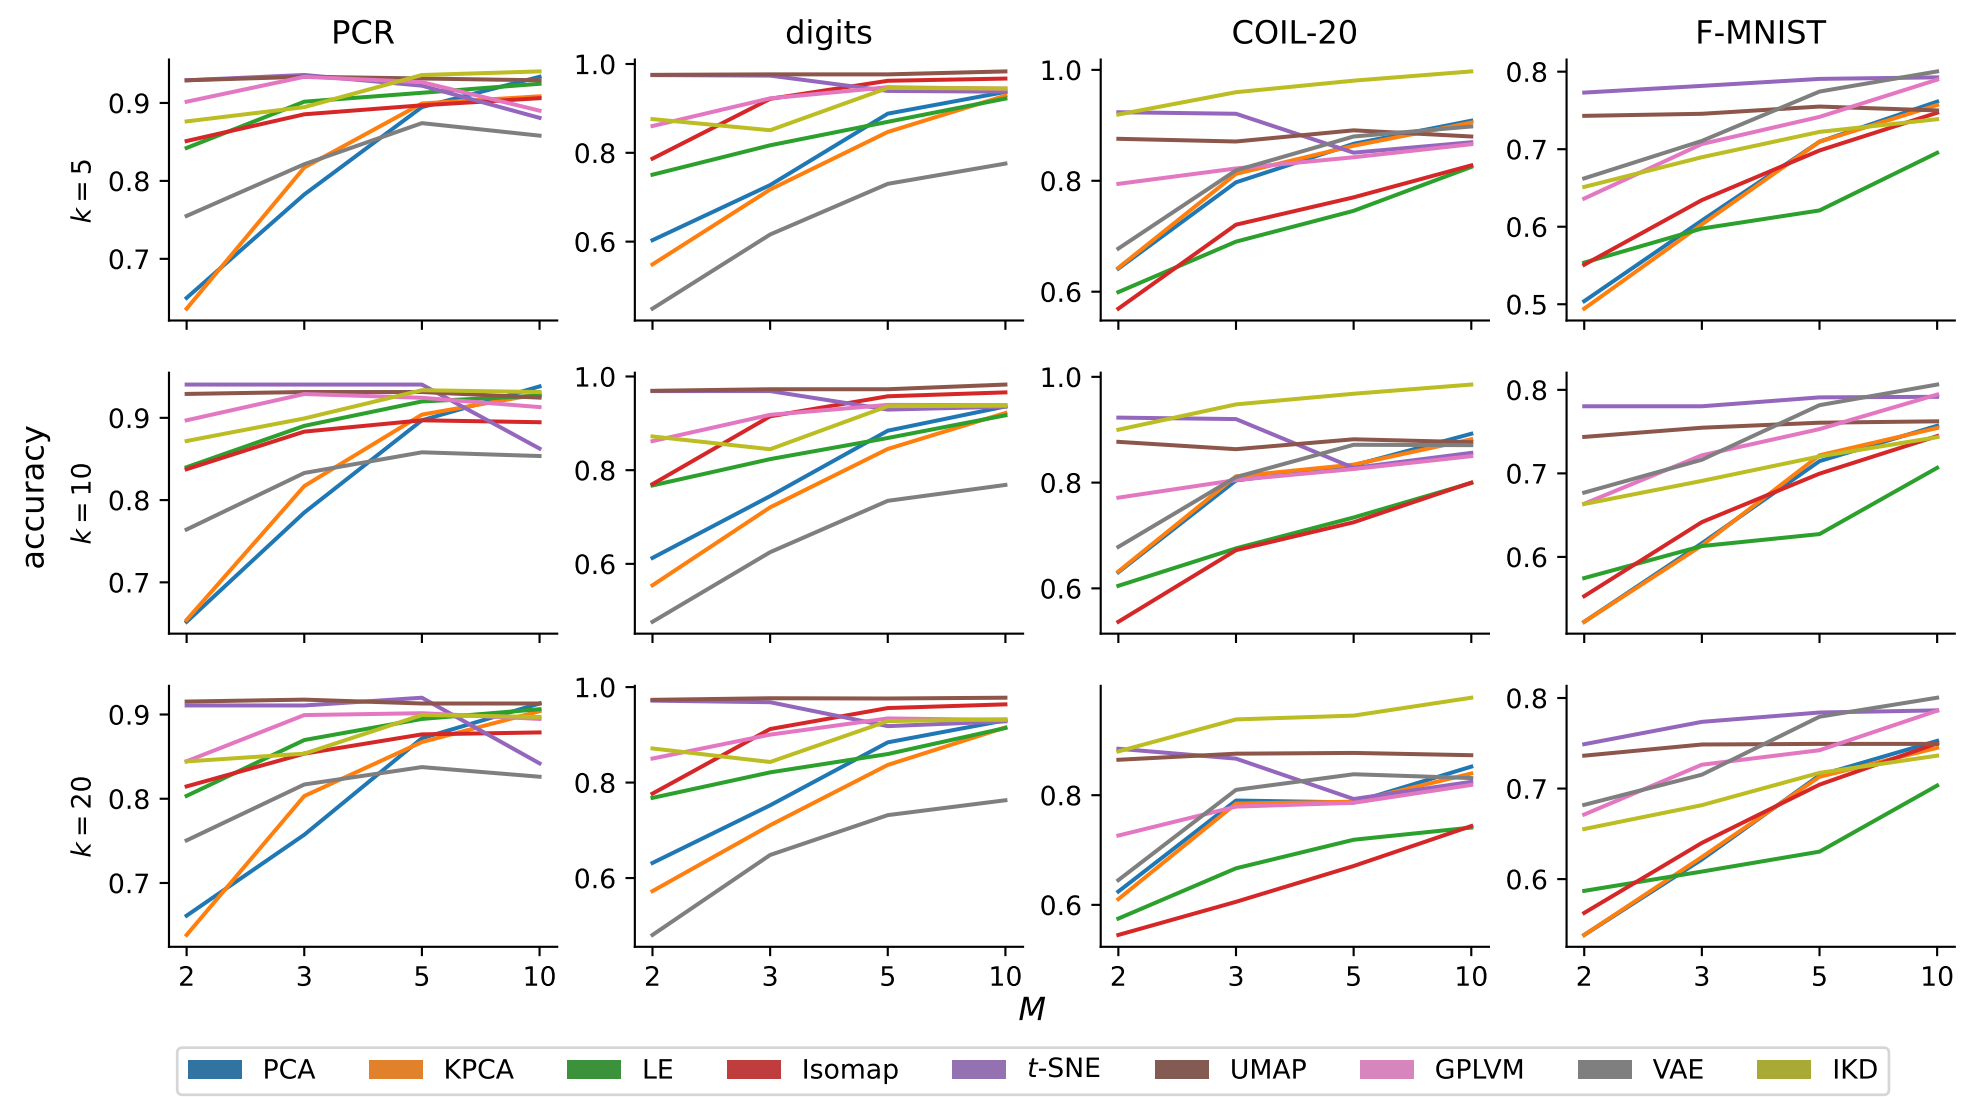

Supplement: supplementary_material [file attachment]

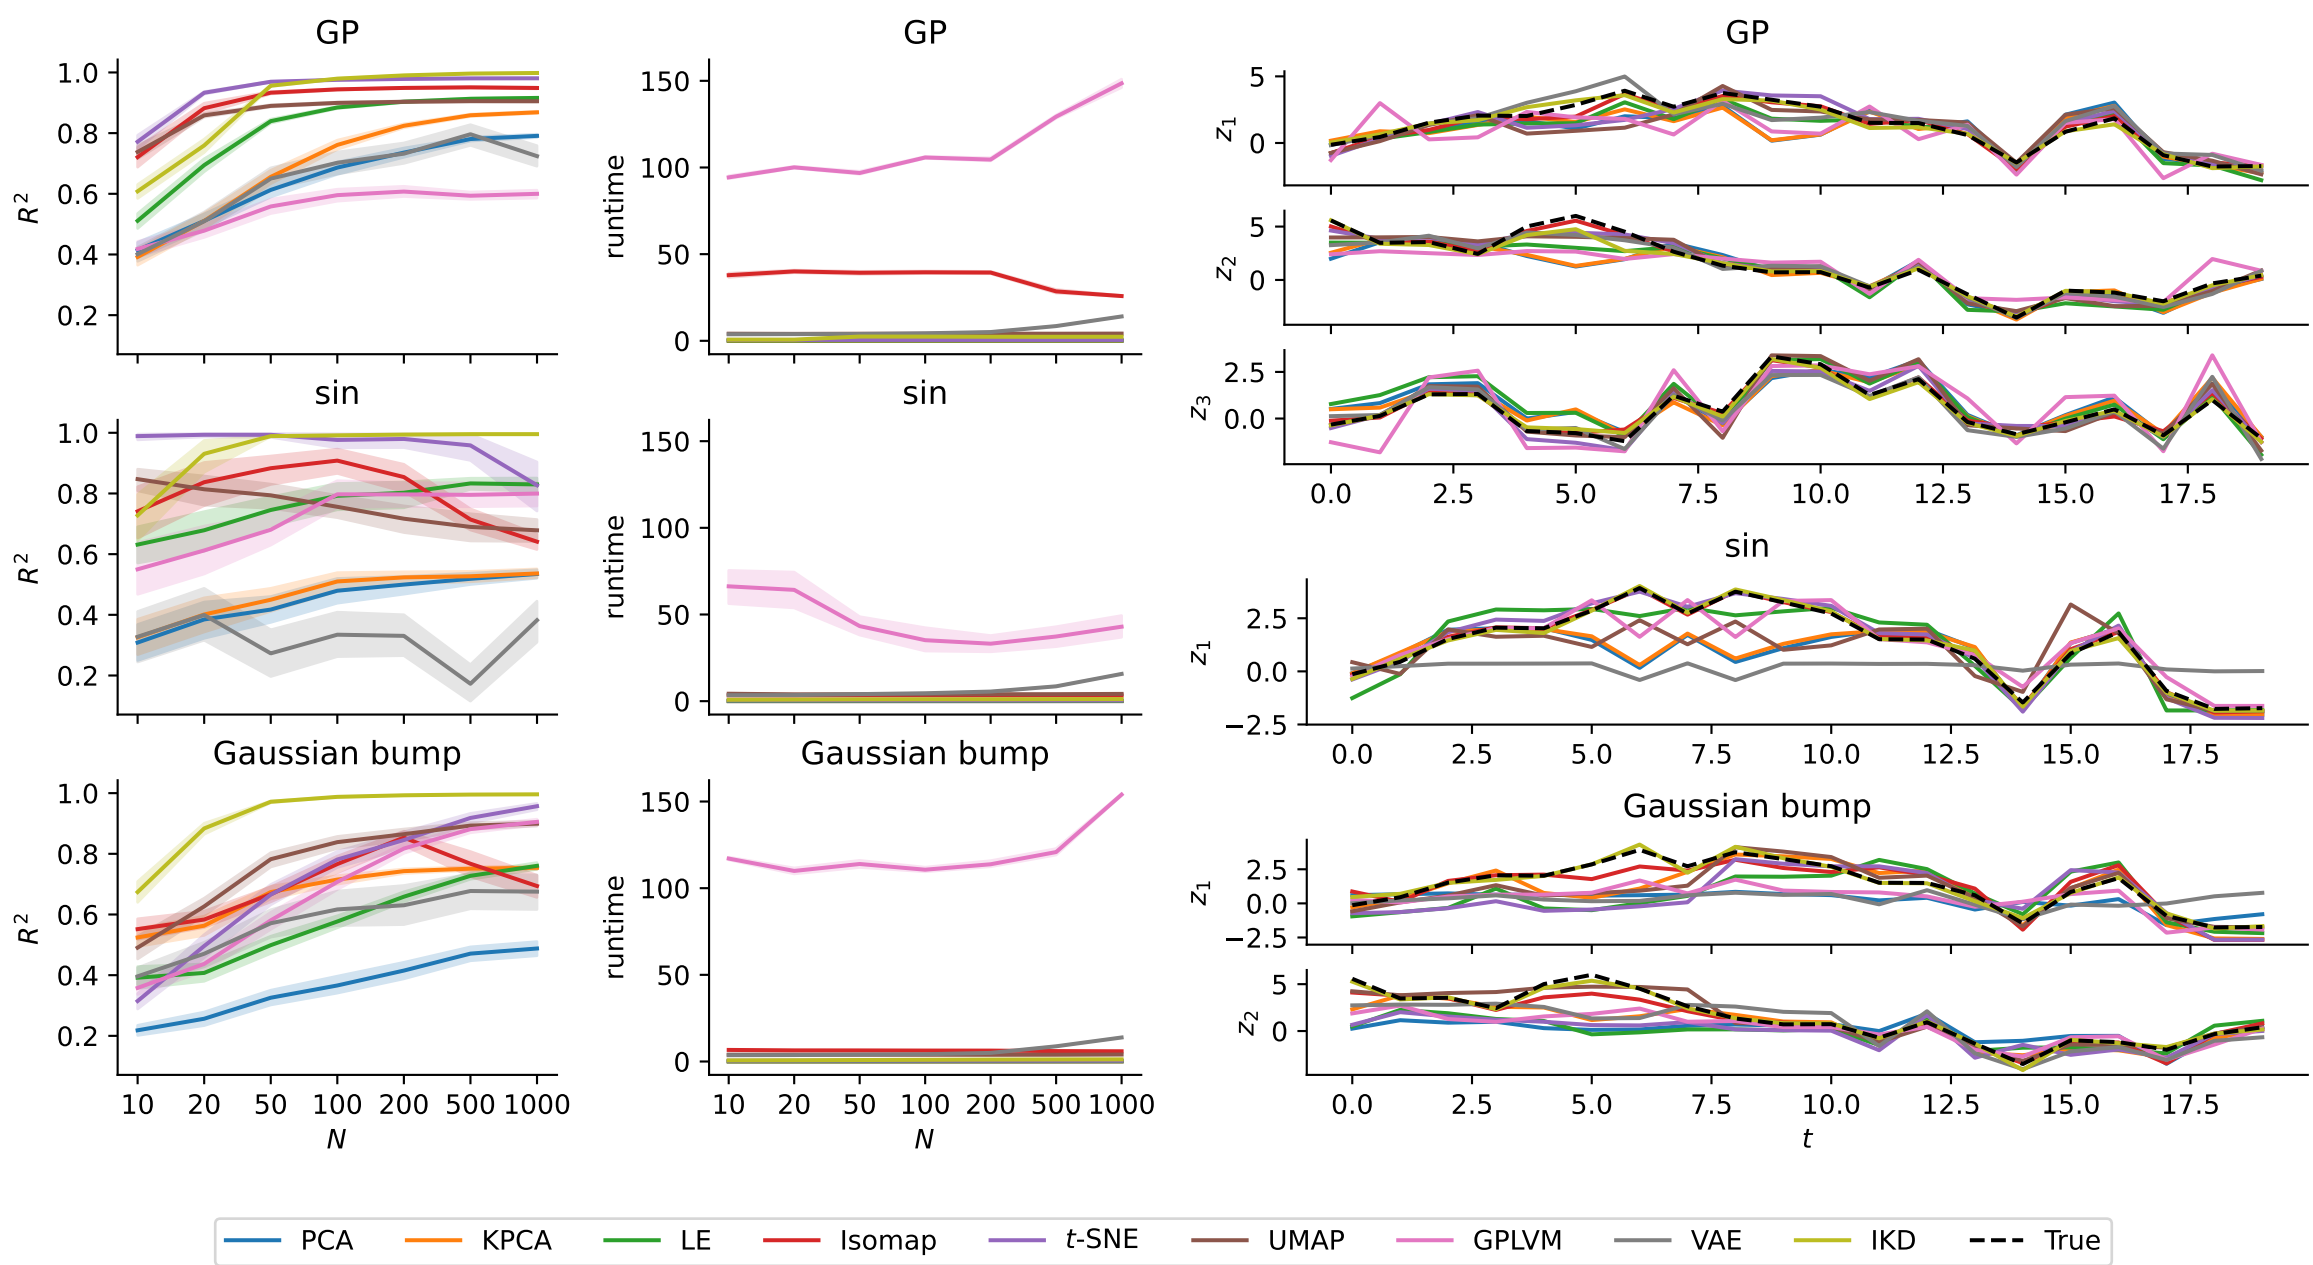

Supplement: supplementary_material [file attachment]

squared exponential

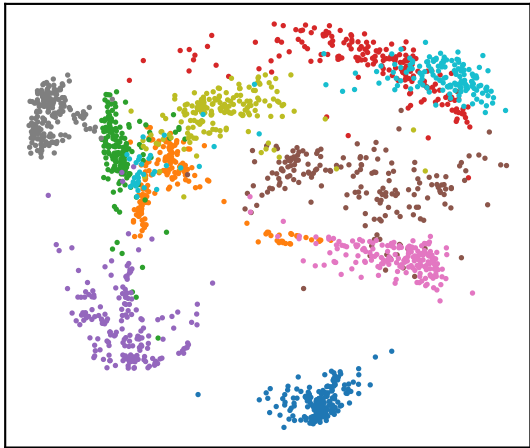

rational quadratic

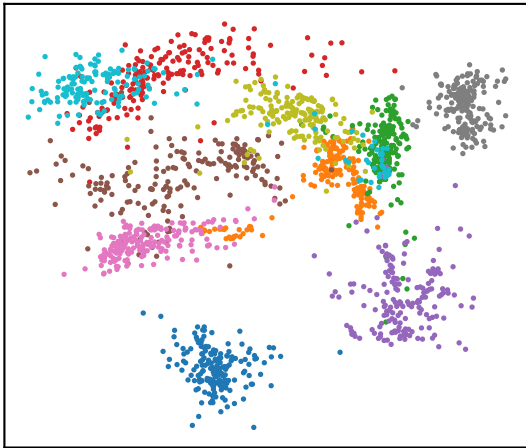

$\gamma$ -exponential

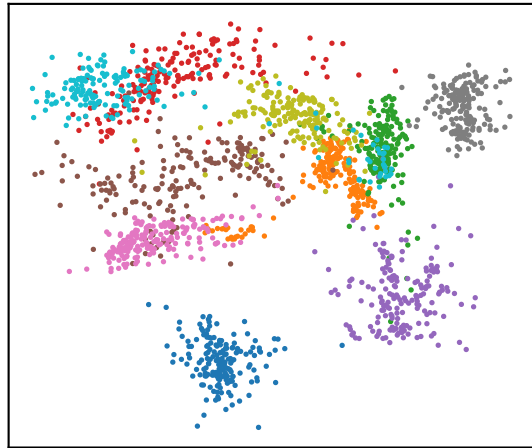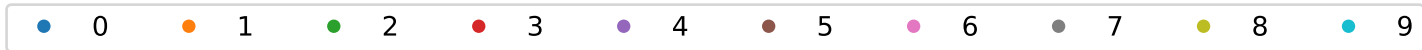

Supplement: supplementary_material [file attachment]

PCA

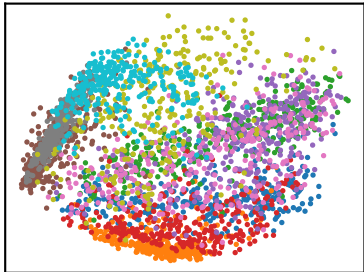

KPCA

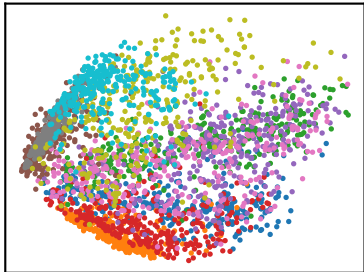

LE

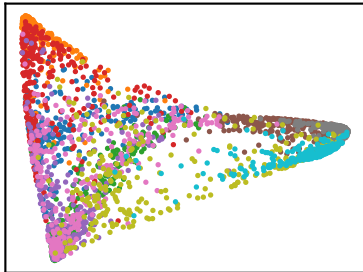

Isomap

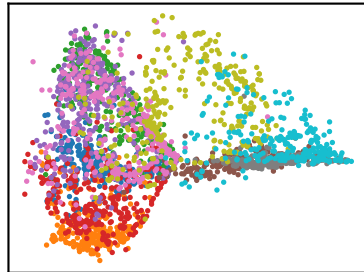 $t$ -SNE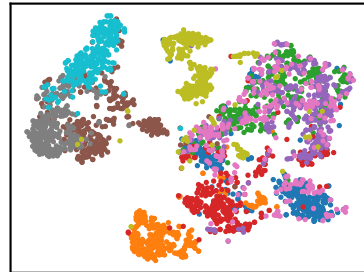

UMAP

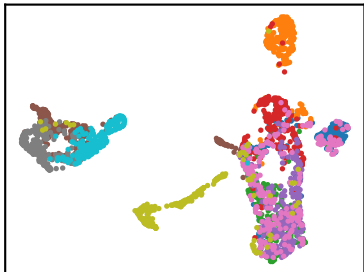

GPLVM

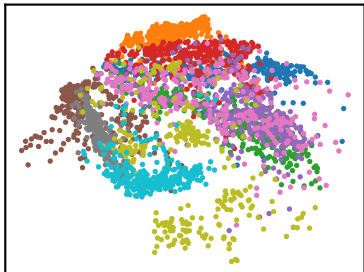

VAE

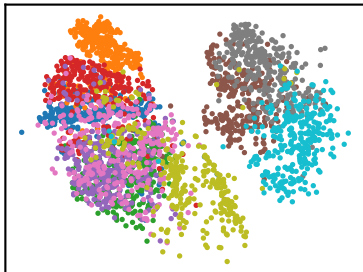

IKD

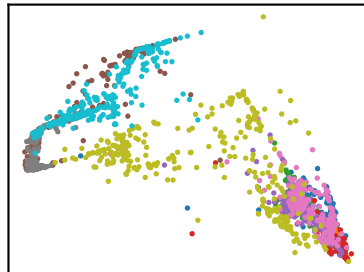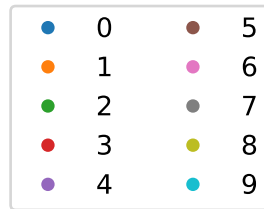

Supplement: supplementary_material [file attachment]

Hard

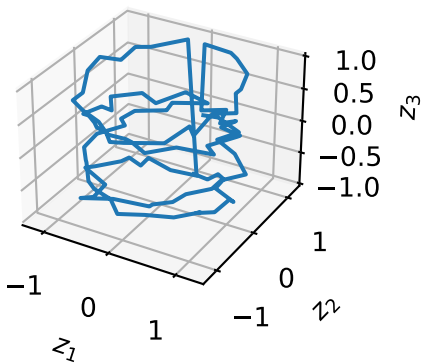

Medium

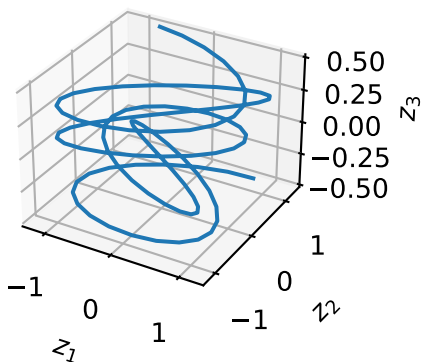

Easy

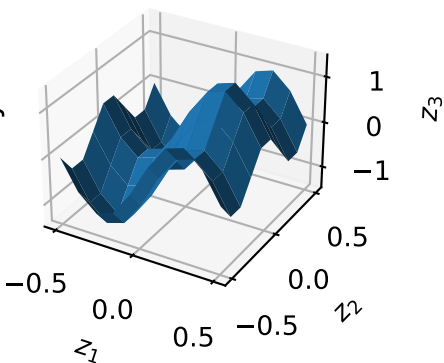

Supplement: supplementary_material [file attachment]

model match

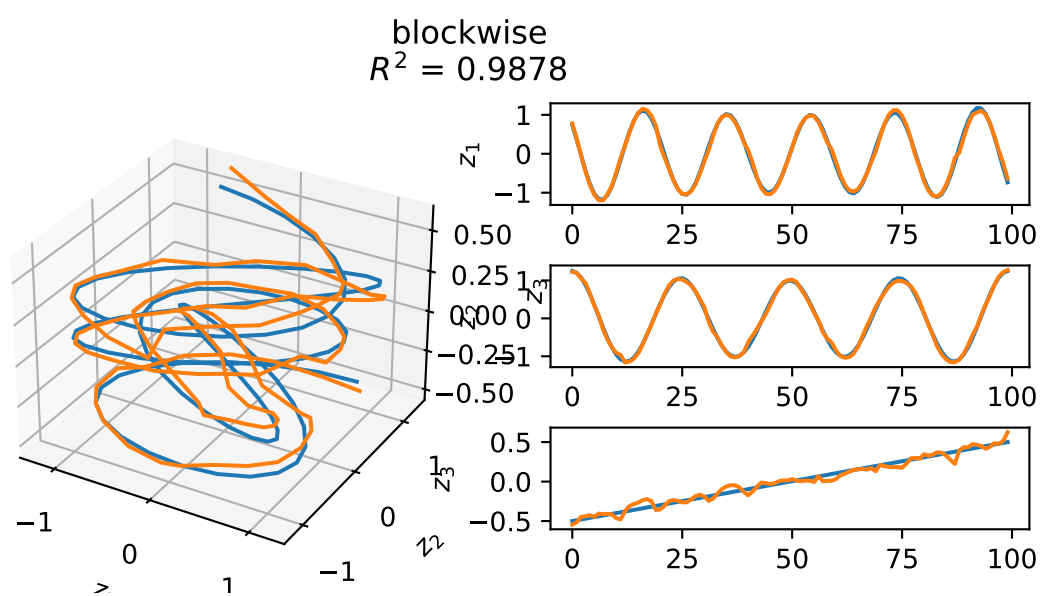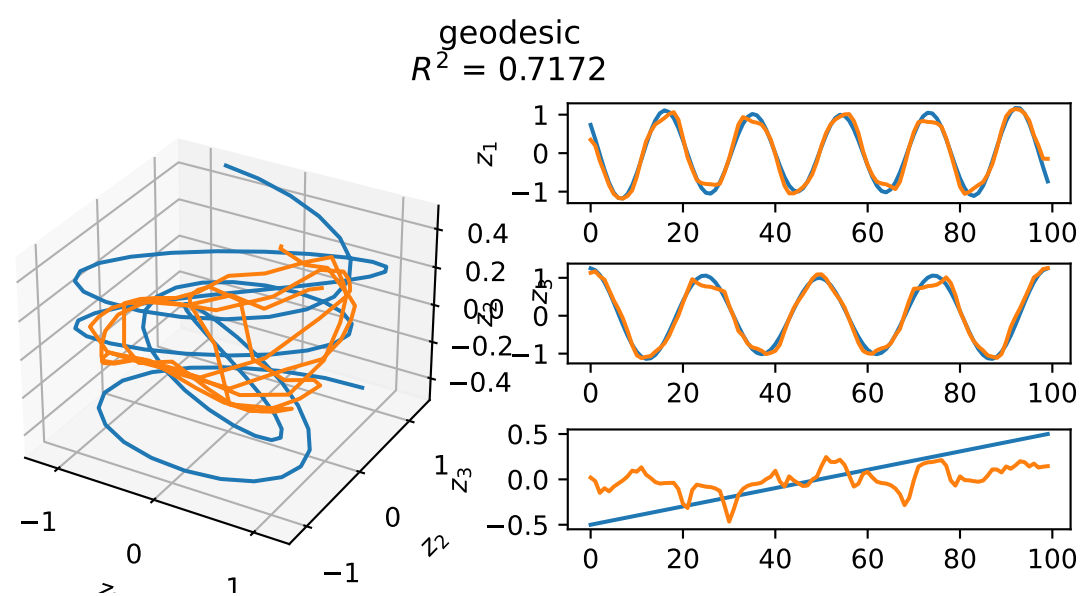

model mismatch

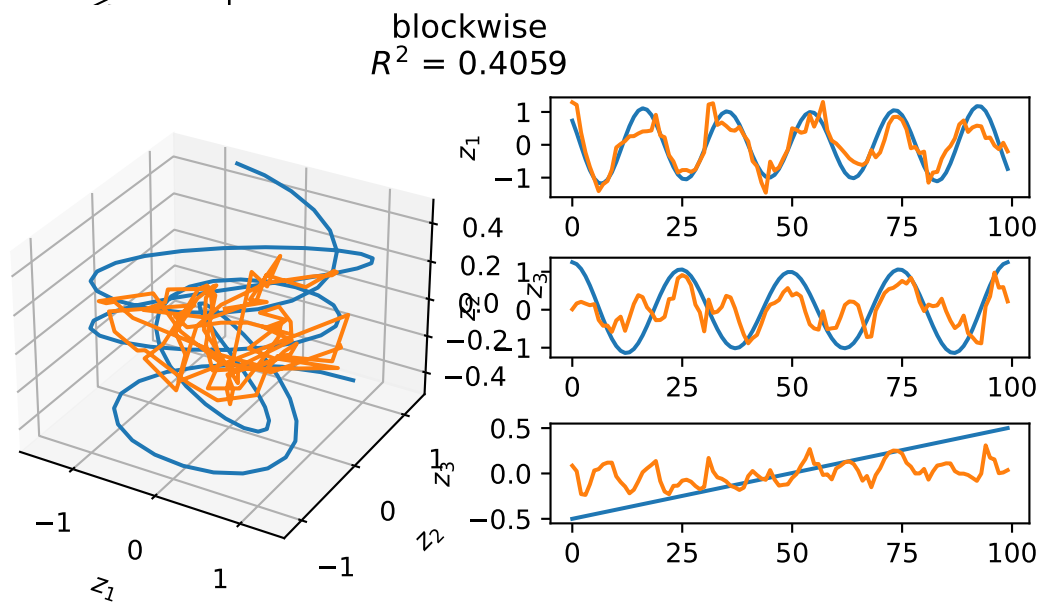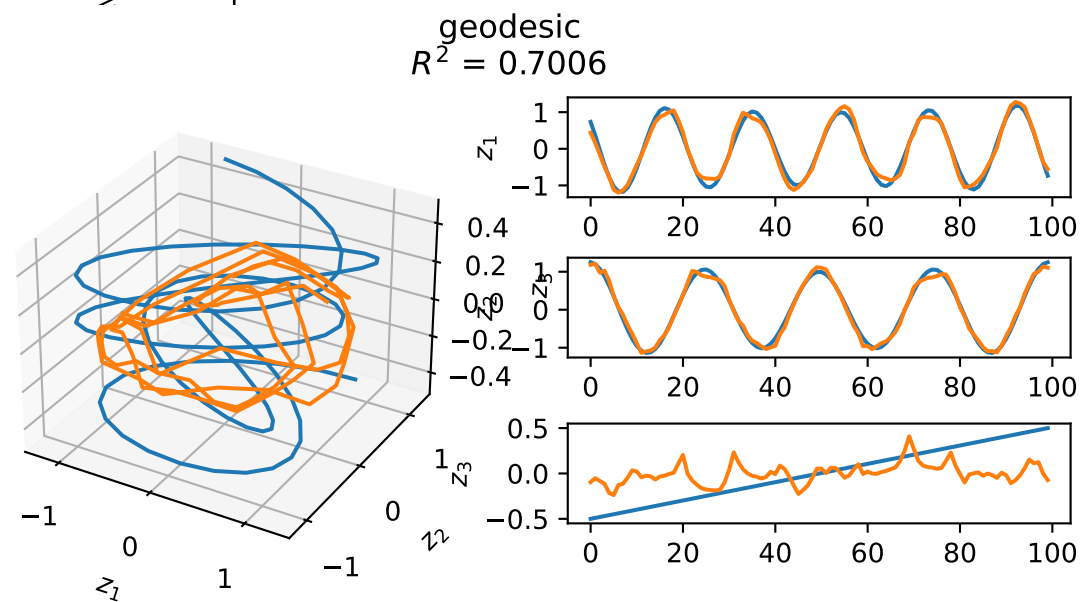

Supplement: supplementary_material [file attachment]

PCA

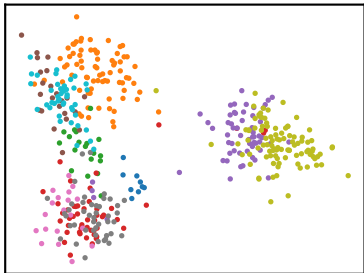

KPCA

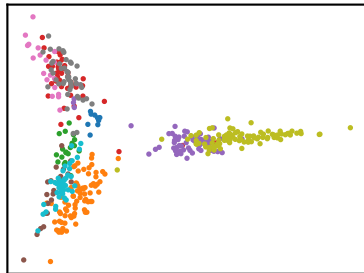

LE

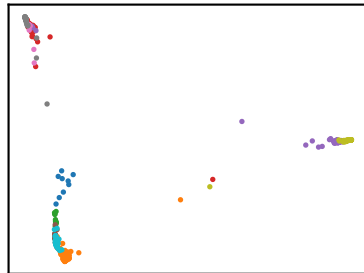

Isomap

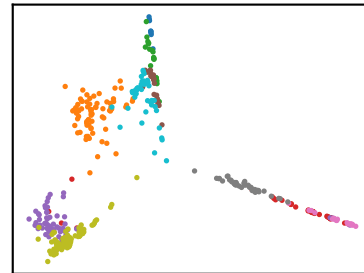*t*-SNE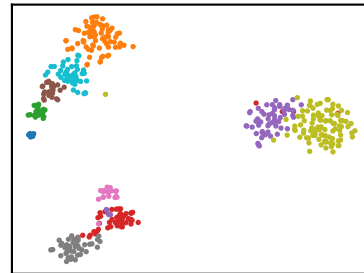

UMAP

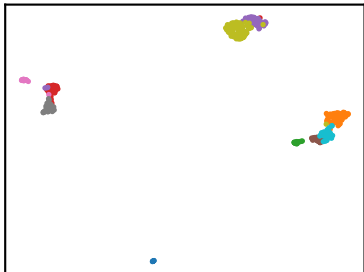

GPLVM

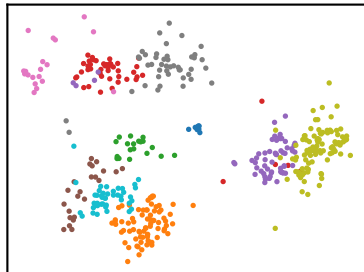

VAE

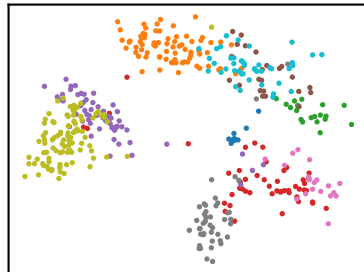

IKD

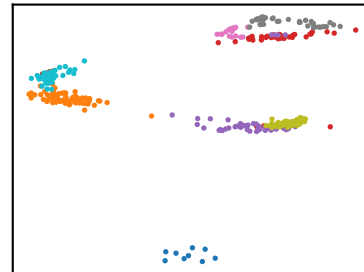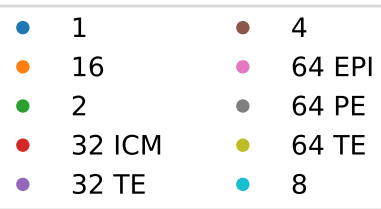

Supplement: supplementary_material [file attachment]

squared exponential

rational quadratic

 $\gamma$ -exponential

Matérn

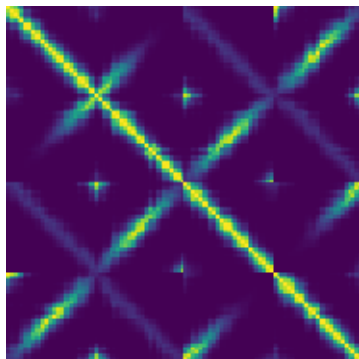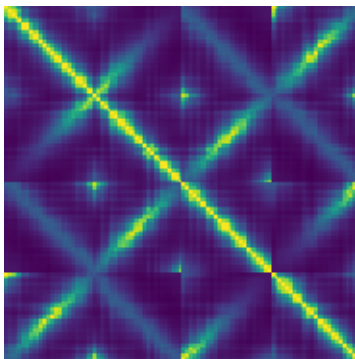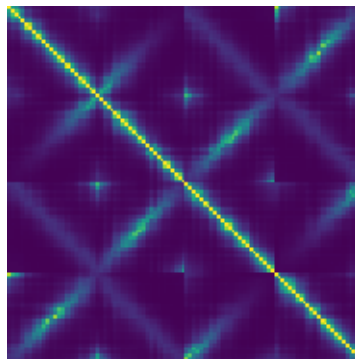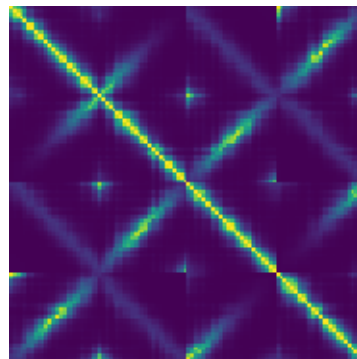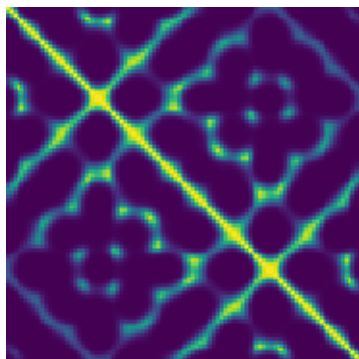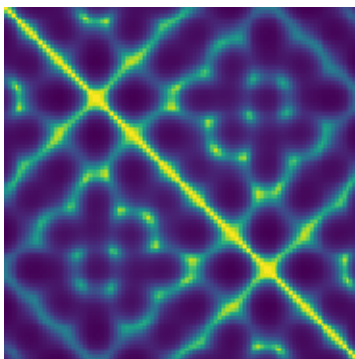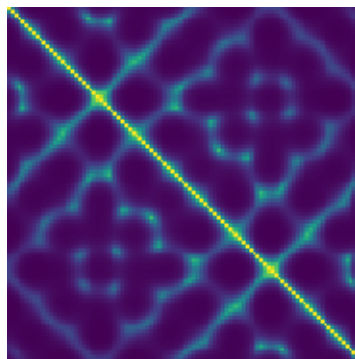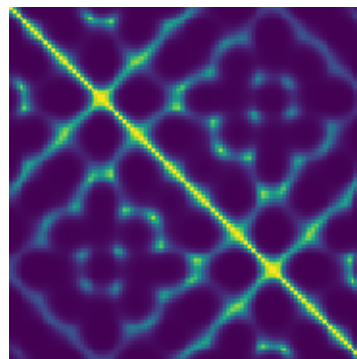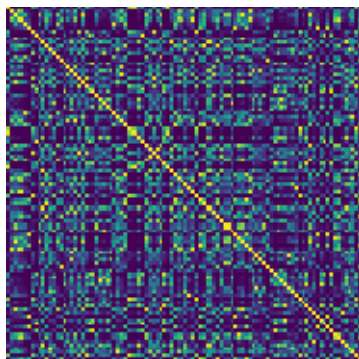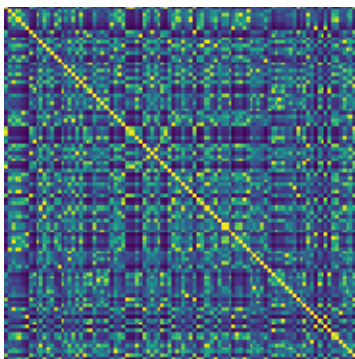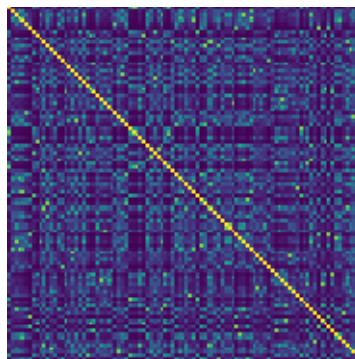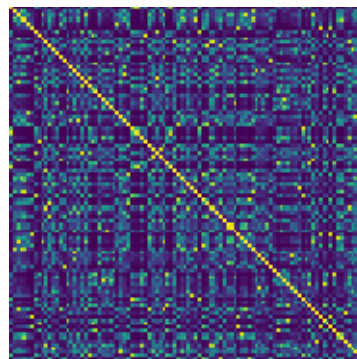

Supplement: supplementary_material [file attachment]

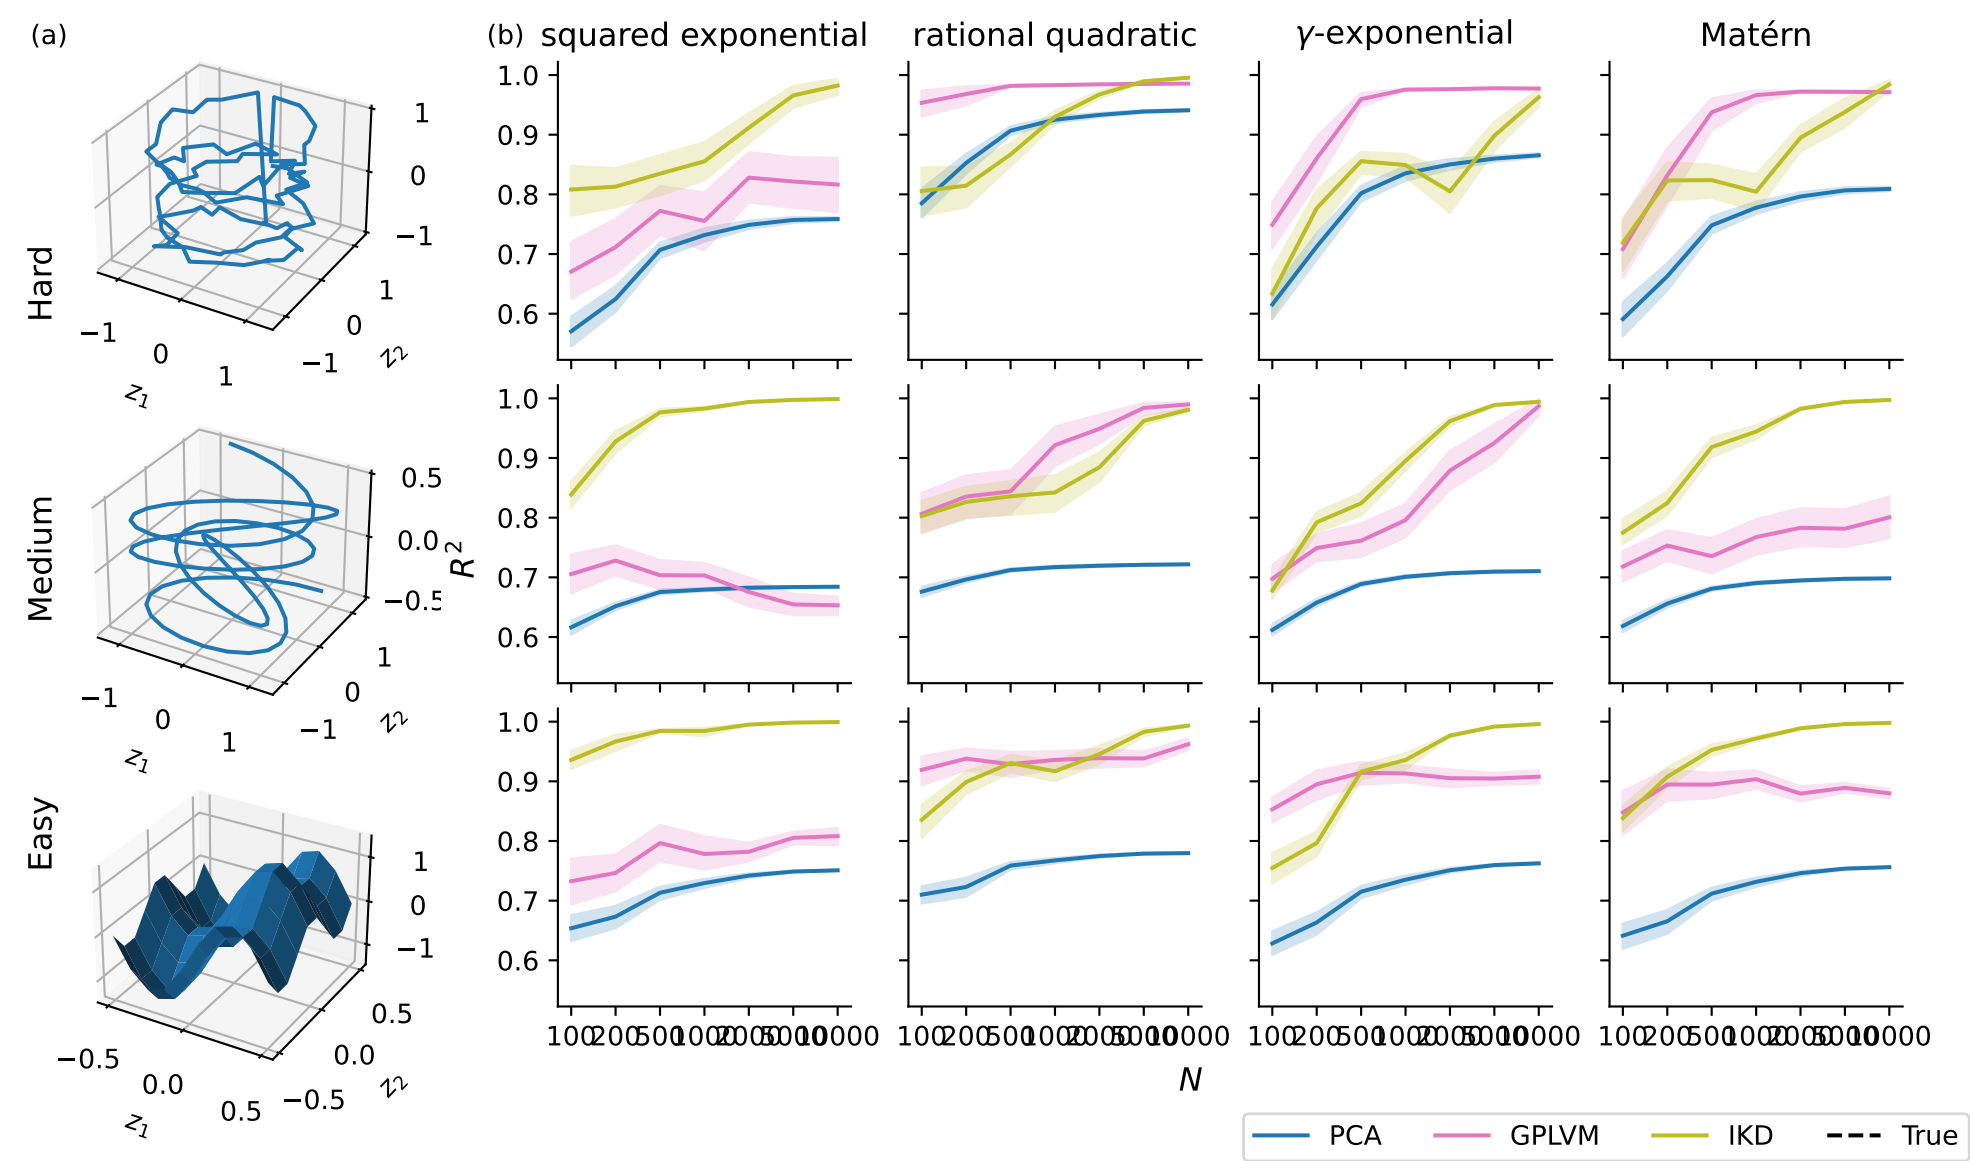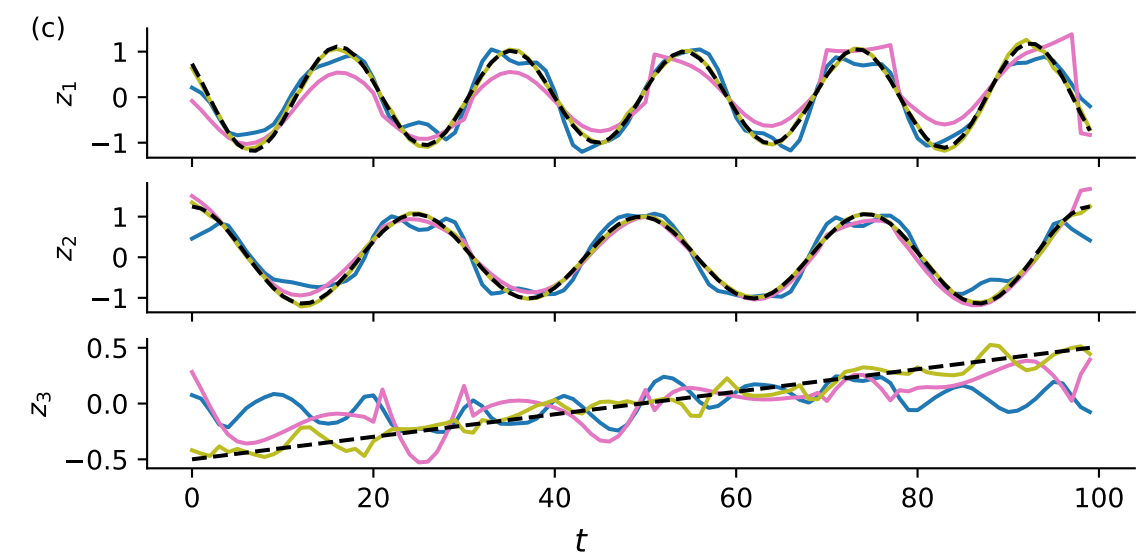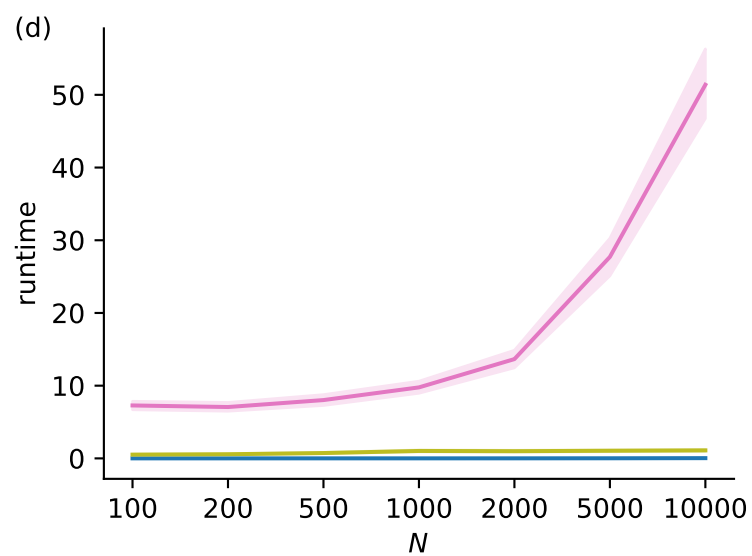

Supplement: supplementary_material [file attachment]

PCA

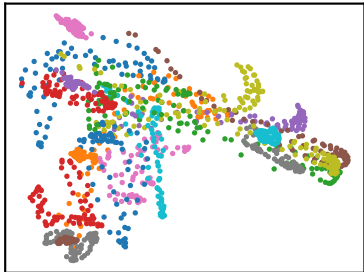

KPCA

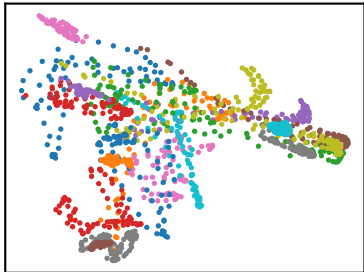

LE

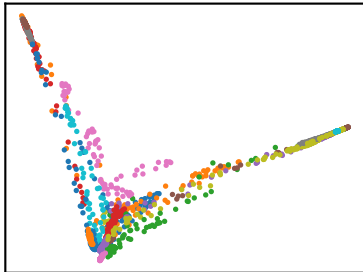

Isomap

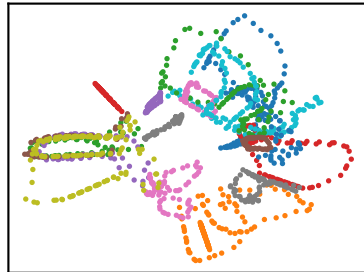 $t$ -SNE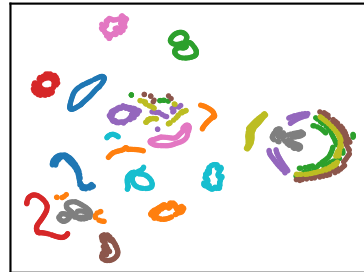

UMAP

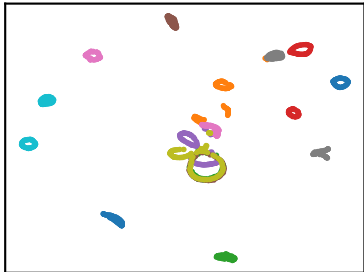

GPLVM

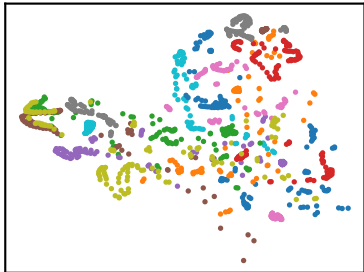

VAE

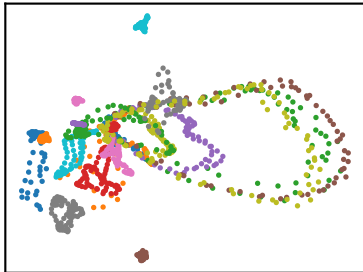

IKD

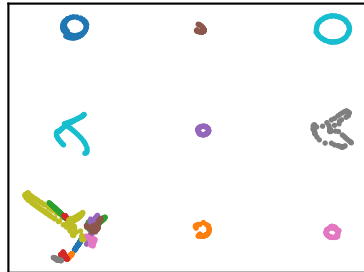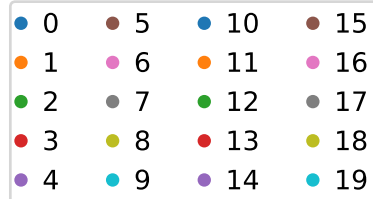

Supplement: supplementary_material [file attachment]

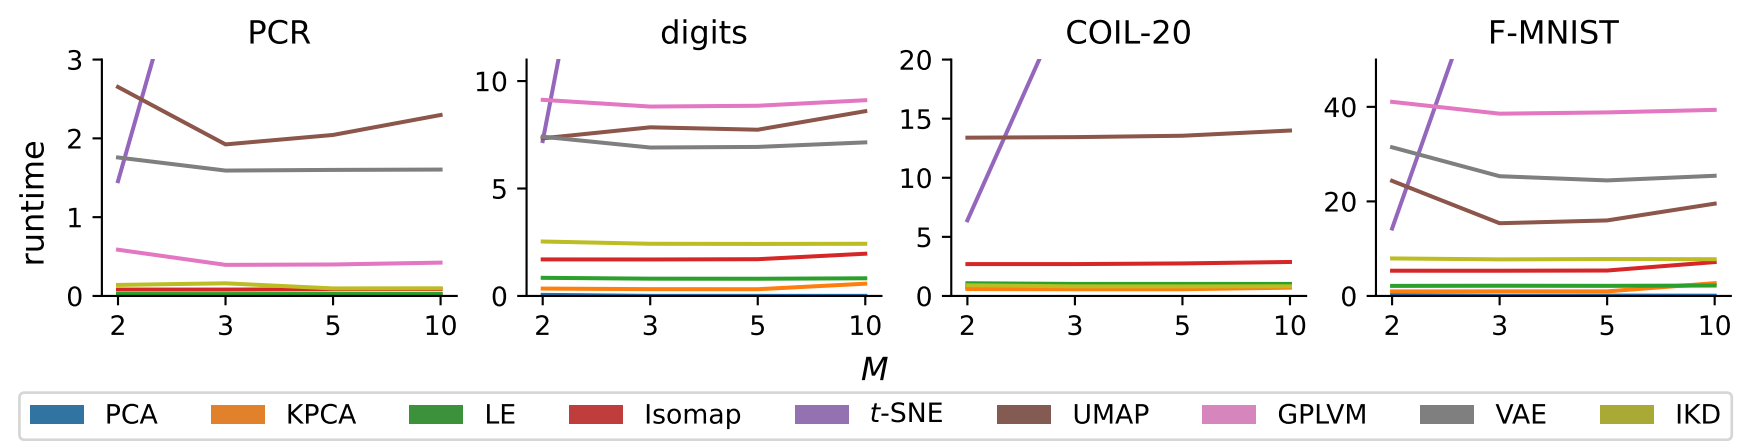

Supplement: supplementary_material [file attachment]
